# Supplementary material for: Leprosy Post-Exposure Prophylaxis (LPEP) programme: study protocol for evaluating the feasibility and impact on case detection rates of contact tracing and single dose rifampicin
Source: PubMed Central journal article supplement — BMJ Open. 2016 Nov 17;6(11):e013633. doi: 10.1136/bmjopen-2016-013633 (PMC5128948; doi:10.1136/bmjopen-2016-013633), 2016-11-17
Supplement: bmjopen-2016-013633supp_annex.pdf [file bmjopen-2016-013633supp_annex.pdf]

## ANNEX

Annex 1 Individual data to be collected and reported for (A) index patients and (B) contacts.

### (A) Data collected for index patients

| Indicator                                                           | Comment                                                                                                                                        |
|---------------------------------------------------------------------|------------------------------------------------------------------------------------------------------------------------------------------------|
| Name                                                                | For local reference, not to be entered/transmitted to international partners.                                                                  |
| Unique patient ID/ Registration number                              | Provides a unique identifier for each index case, allowing its unambiguous identification across documents and time.                           |
| LPEP ID                                                             | Consists of Country/district/health facility acronym and number followed by the registration number.                                           |
| Country                                                             | Basic administrative information.                                                                                                              |
| District                                                            | Basic administrative information.                                                                                                              |
| Health facility                                                     | Basic administrative information.                                                                                                              |
| Age                                                                 | Basic demographic information about the index case.                                                                                            |
| Gender                                                              | Basic demographic information about the index case.                                                                                            |
| Address / location                                                  | Collect level of detail as appropriate to the setting, e.g. village name                                                                       |
| LPEP contact ID                                                     | To identify previous SDR treatment (from contact database)                                                                                     |
| Date of diagnosis                                                   | General information on treatment.                                                                                                              |
| Disease classification at time of diagnosis                         | According to WHO definition into MB/PB as general information on clinical presentation.                                                        |
| Disability grade at time of diagnosis                               | 0/1/2 as general information on clinical presentation.                                                                                         |
| Mode of case discovery/detection                                    | Contact screening, voluntary, mass screening, referred                                                                                         |
| Received rifampicin within the last 2 years                         | Includes rifampicin from LPEP project, TB treatment etc.                                                                                       |
| Consent to leprosy status disclosure and participation in the study | On separate information sheet to document informed consent to study participation, including disclosure of leprosy diagnosis to contacts.      |
| Reason for missing contact screening activities                     | To explain lack of contacts in contact screening database (having no contacts indicated, living outside LPEP area, home inaccessible).         |
| List of potential contacts as reported by the patient               | Identifying information for all potential contacts as provided by the index case. This information will provide the basis for contact tracing. |

## (B) Data collected for contacts

| Indicator                                                      | Comment                                                                                                                                                                                                                                                                            |
|----------------------------------------------------------------|------------------------------------------------------------------------------------------------------------------------------------------------------------------------------------------------------------------------------------------------------------------------------------|
| Name                                                           | For local reference, not to be entered/transmitted to international partners.                                                                                                                                                                                                      |
| Unique contact ID/ Registration number                         | Provides a unique identifier for the contact.<br>The LPEP contact registration number consists of the index case registration number and an extension (number C01, C02, ...).                                                                                                      |
| LPEP ID                                                        | Consists of Country/district/health facility acronym and number followed by the registration number.                                                                                                                                                                               |
| Country                                                        | ID (India), IN (Indonesia), LK (Sri Lanka), MM (Myanmar), NP (Nepal), TZ (Tanzania).                                                                                                                                                                                               |
| District                                                       | Basic administrative information.                                                                                                                                                                                                                                                  |
| Health facility                                                | Basic administrative information.                                                                                                                                                                                                                                                  |
| Date of screening                                              | General information on tracing and screening.                                                                                                                                                                                                                                      |
| Present / absent at time of screening                          | Availability of contact to be screened.                                                                                                                                                                                                                                            |
| Consent of contact to screening and LPEP                       | To document informed consent to study participation, including screening and LPEP, if eligible.                                                                                                                                                                                    |
| Age                                                            | General information about the contact.                                                                                                                                                                                                                                             |
| Gender                                                         | General information about the contact.                                                                                                                                                                                                                                             |
| Address (if other than patient) / location                     | General information about the contact.                                                                                                                                                                                                                                             |
| Distance code                                                  | Household contact, neighbour, social contact as general information about the contact.                                                                                                                                                                                             |
| Relationship code                                              | Degree of (blood) relationship to determine influence of genetic distance (Brother or sister; brother or sister in law; child; son or daughter in law; spouse; not related; other relative; parent; parent in law).                                                                |
| Outcome of screening                                           | Rationale for further actions (Leprosy diagnosed, suspicion of leprosy and confirmation required, no signs of leprosy). In case of suspicion: outcome of confirmation (leprosy diagnosed, no signs of leprosy) to be obtained from referral registry                               |
| Exclusion criteria for SDR (if screening negative for leprosy) | Reason for not delivering LPEP among screening negative participants (No LPEP informed consent, pregnancy, previous rifampicin (e.g. for TB), age <2 years (or as applied in country), liver or renal disease, LPEP received as leprosy contact, rifampicin allergy, possible TB). |
| BCG vaccination                                                | Scar or vaccination card entry present; no scar or vaccination card entry                                                                                                                                                                                                          |
| SDR dose (if LPEP provided)                                    | Dose in mg (150, 300, 450, 600)                                                                                                                                                                                                                                                    |

## Annex 2 Differences in set-up of national leprosy programmes between the LPEP countries

| Country          | Name programme | Structure leprosy service             | Case detection     | Contact tracing                                                                         | Data collection                                                                          | IILEP Partner |
|------------------|----------------|---------------------------------------|--------------------|-----------------------------------------------------------------------------------------|------------------------------------------------------------------------------------------|---------------|
| <b>India</b>     | NLEP           | Integrated into general health system | Active and passive | Routine HH and neighbours contact tracing                                               | Individual at sub-centre level, then aggregated (paper based)                            | NLR, GLRA     |
| <b>Indonesia</b> | NLCP           | Integrated into general health system | Mainly passive     | Routine HH and neighbours contact tracing; integrated SDR since 2012 in three districts | Individual at sub-centre level, then aggregated (paper based)                            | NLR           |
| <b>Myanmar</b>   | NLCP           | Integrated into general health system | Mainly passive     | Systematic screening of HH contacts at 2 and 5 years                                    | Limited individual data at national level (paper-based)                                  | ALM           |
| <b>Nepal</b>     | NLCP           | Integrated into general health system | Mainly passive     | Routine HH and neighbours contact tracing                                               | Individual at health-post level, then aggregated (paper-based)                           | NLR           |
| <b>Sri Lanka</b> | ALC            | Integrated into general health system | Active and passive | Systematic screening of HH contacts started                                             | Full individual case data at national level (paper-based; start of electronic reporting) | FAIRMED       |
| <b>Tanzania</b>  | NTLP           | Integrated into general health system | Mainly passive     | Planned to be introduced                                                                | Individual at district level, then aggregated (paper-based)                              | GLRA          |

Abbreviations: ALC: Anti Leprosy Campaign ; ALM: American Leprosy Mission; GLRA; German Leprosy and Tuberculosis Relief Association; HH: Household; IILEP: International Federation of Anti-Leprosy Associations; NLCP: National Leprosy Control Programme; NLEP: National Leprosy Eradication Programme; NLR: Netherlands Leprosy Relief; NTLP: National Tuberculosis and Leprosy Programme; SDR: single dose rifampicin
